# Supplementary material
Source: PubMed Central journal article supplement (PMC6413790)
Supplement: jciinsight-4-124267-s089.pdf [file jciinsight-4-124267-s089.pdf]

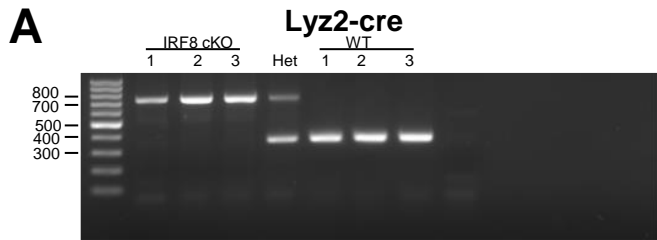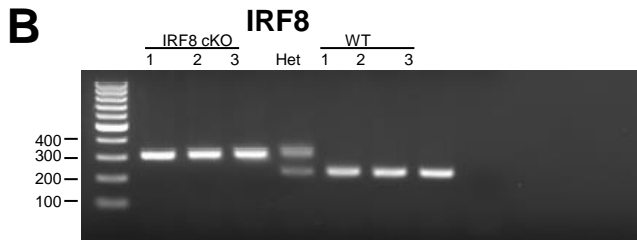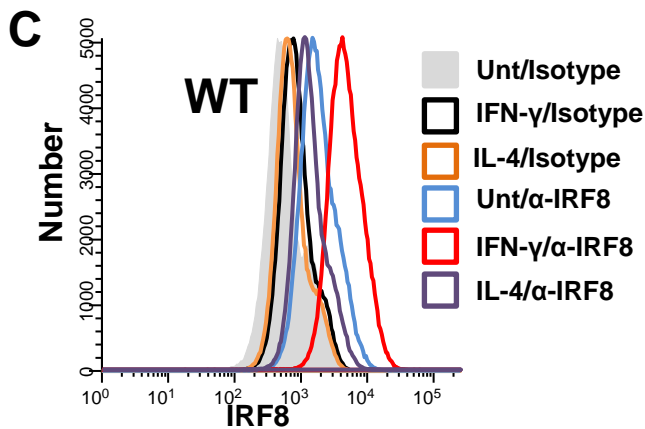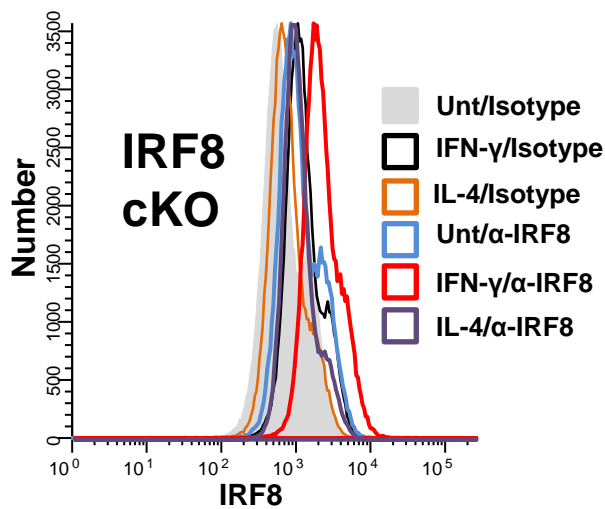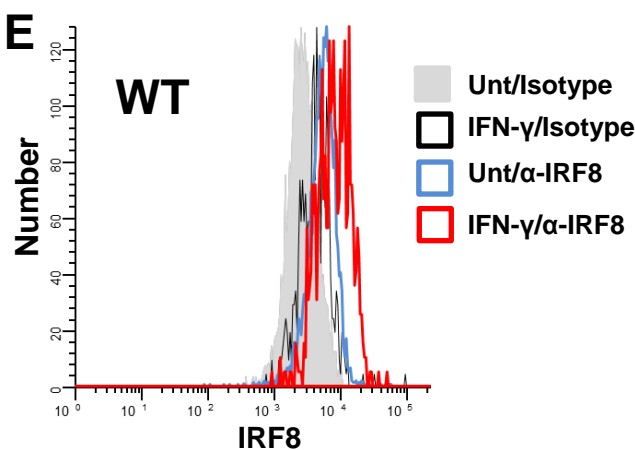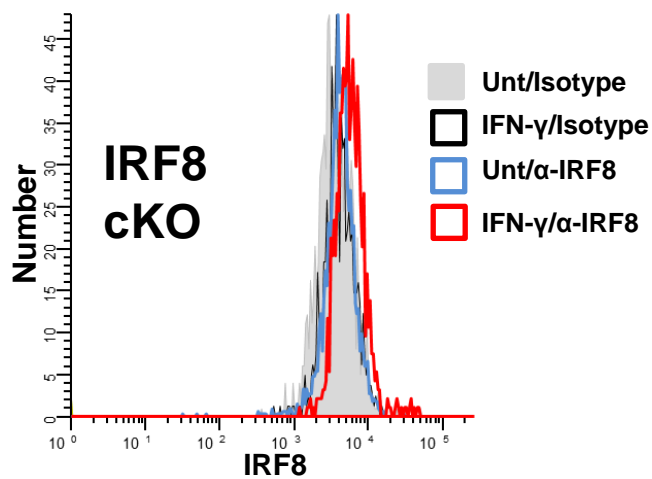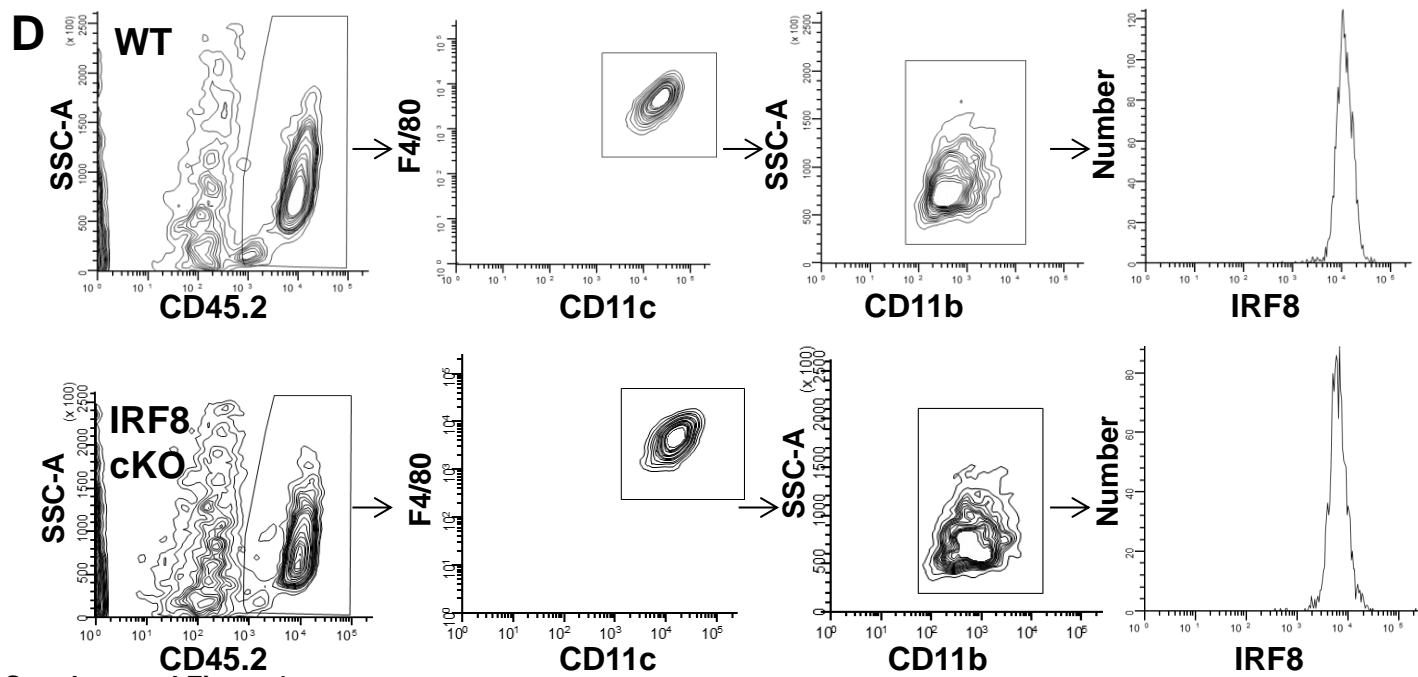

Supplemental Figure 1

**Supplemental Figure 1. Genotyping of WT and IRF8 cKO mice.** Tail DNA from WT

(IRF8<sup>fl/fl</sup>) or IRF8 cKO mice (n=3 each) was isolated and used for PCR to detect (A)

*Lyz2-Cre* and (B) the deleted IRF8 band. Heterozygous mice have features of both WT

and IRF8 cKO genotypes. (C) Flow cytometry histogram of intracellular IRF8 staining

in BMDMs from WT or IRF8 cKO mice after treatment with vehicle (untreated), IFN- $\gamma$

(100 U/ml) or IL-4 (20 ng/mL) for 24 hours. (D) Gating strategy for BAL-derived

macrophages from WT or IRF8 cKO mice following treatment with IFN- $\gamma$  (100 U/ml for

24 hours). (E) Flow cytometry histogram of intracellular IRF8 staining in BAL-derived

macrophages from WT or IRF8 cKO mice after treatment with vehicle (untreated) or

IFN- $\gamma$  (100 U/ml) for 24 hours.

**A**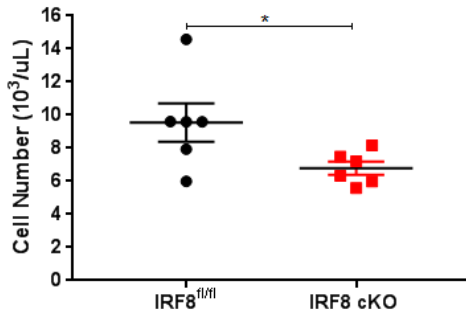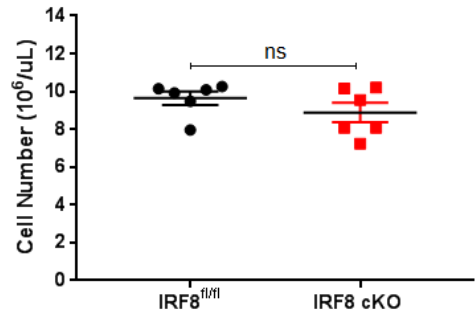**B**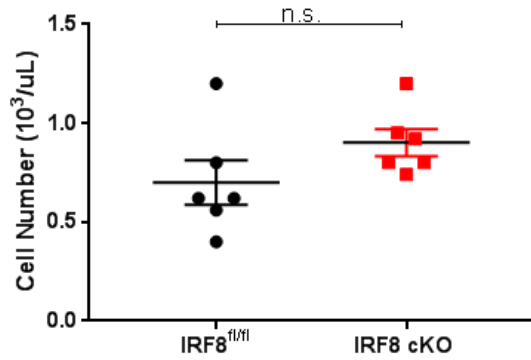**C**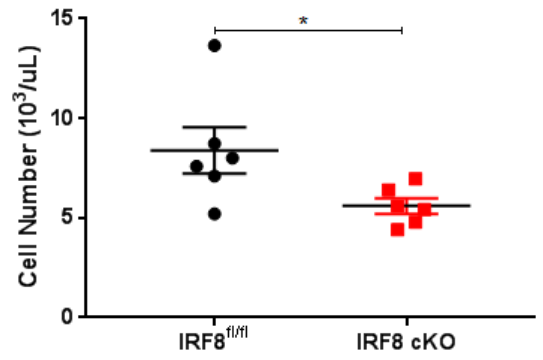**D**

|                          | IRF8 <i>fl/fl</i> (control) |                                     | IRF8 cKO    |                                     |
|--------------------------|-----------------------------|-------------------------------------|-------------|-------------------------------------|
|                          | % of spleen                 | Absolute number (x10 <sup>7</sup> ) | % of spleen | Absolute number (x10 <sup>7</sup> ) |
| Macrophages              | 10 ± 1                      | 0.8 ± 0.3                           | 13 ± 3      | 1.3 ± 0.4                           |
| B cells                  | 59 ± 3                      | 4 ± 1                               | 56 ± 3      | 5.0 ± 1                             |
| CD3 <sup>+</sup> T cells | 22 ± 1                      | 1.0 ± 0.3                           | 22 ± 3      | 2.0 ± 0.3                           |
| Granulocytes             | 10 ± 1                      | 1 ± 0.2                             | 11 ± 1      | 1.0 ± 0.3                           |

**Supplemental Figure 2. Analyses of immune cell populations in WT and IRF8 cKO mice.**

Retro-orbital blood draws were performed in WT (IRF8<sup>fl/fl</sup>) or IRF8 cKO mice, and the type, absolute number, or percentage of the indicated blood cells were quantified by an automated CBC instrument. (A) WBC (left panel) or RBC (right panel) counts, (B) granulocytes, (C) total lymphocytes, or (D) macrophages, B cells, CD3<sup>+</sup> T cells or granulocytes. Data recorded as mean ± SEM and significance determined by a 2-tailed Mann-Whitney test. In all panels, WT (n=6) or IRF8 cKO (n=6). \**P*<0.05; n.s., not significant

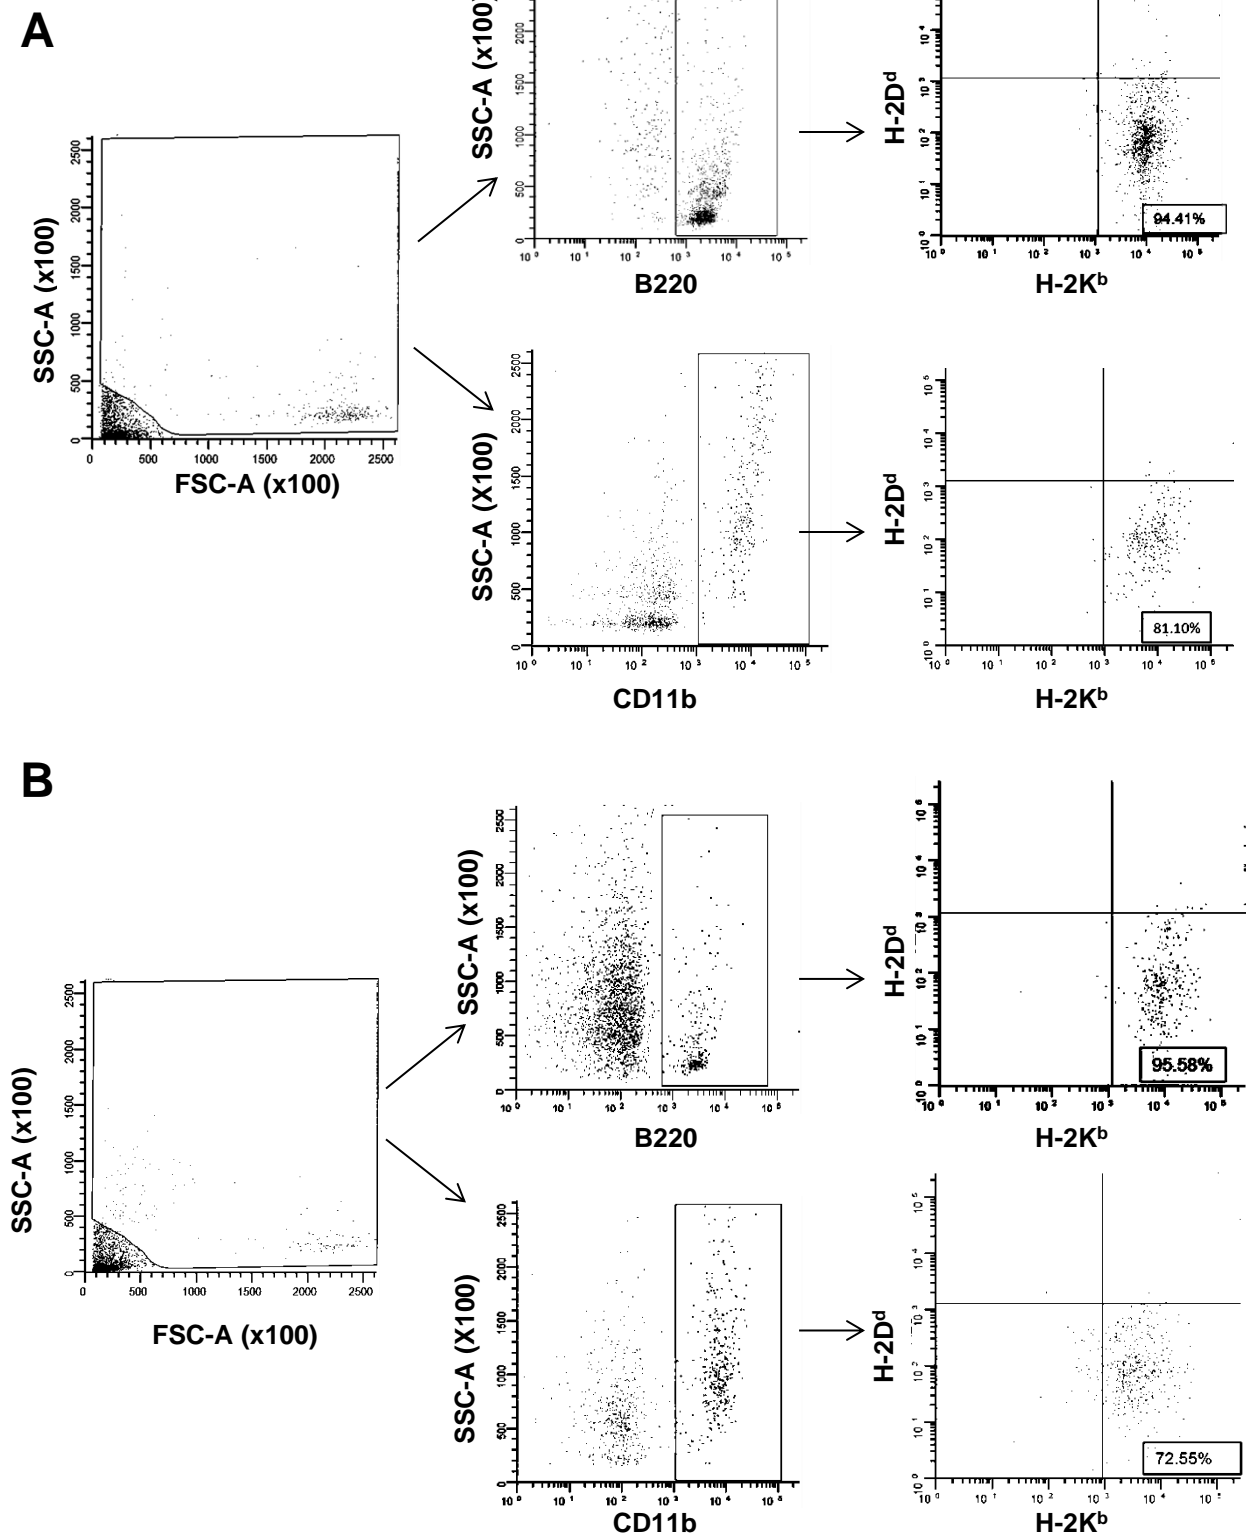

**Supplemental Figure 3. Reconstitution proficiency of donor WT or IRF8 cKO bone**

**marrow cells following transplant.** Representative flow cytometry plots of B cells or total

(CD11b<sup>+</sup>) myeloid populations in the peripheral blood of (A) WT or (B) IRF8 cKO BM

recipients 8 weeks post-transplant.

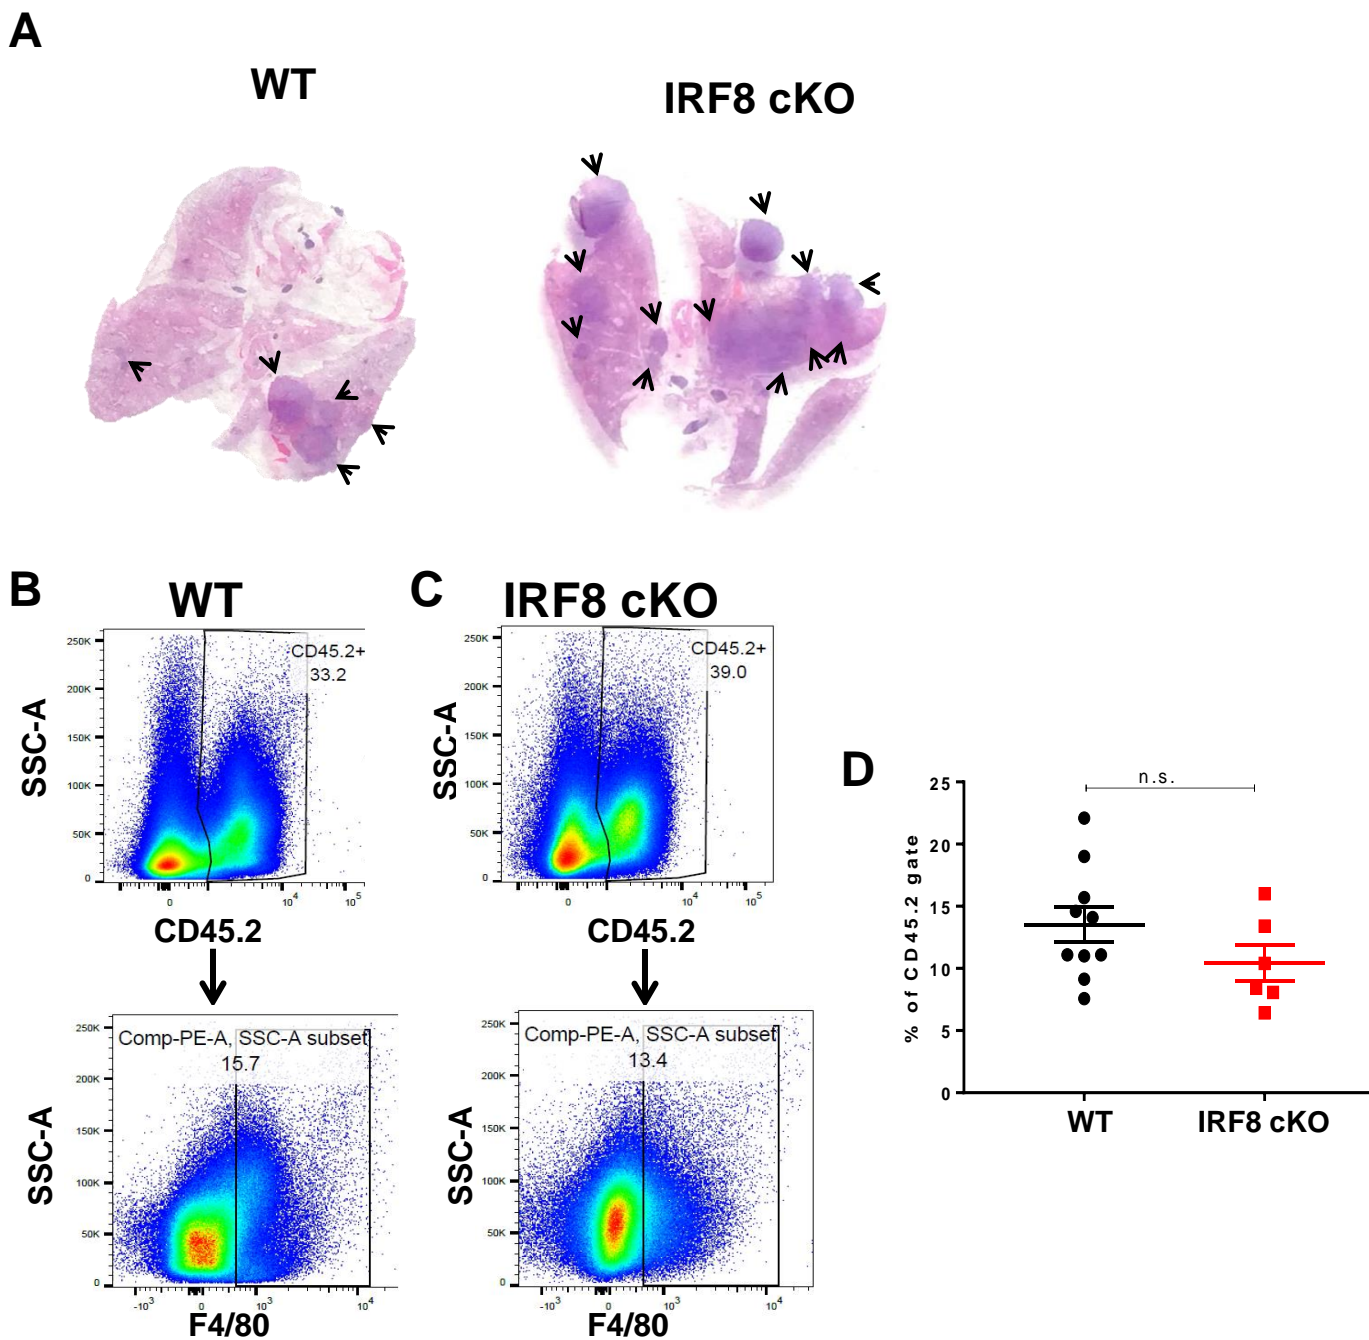

**Supplemental Figure 4. IRF8-deficiency in macrophages does not affect macrophage infiltration into primary tumors, but increases lung metastasis.**

(A) H&E-stained whole lung from 4T1 tumor-bearing WT or IRF8 cKO mice. Metastatic nodules are indicated by arrows (see Figure 2)

Representative flow plots of CD45.2<sup>+</sup>F4/80<sup>+</sup> macrophages infiltrated within tumors of (B) WT or (C)

IRF8 cKO recipient mice. (D) Quantification of macrophage infiltration into 4T1 tumors. Data recorded as mean  $\pm$  SEM and significance determined by the 2-tailed Mann-Whitney test. n.s., not significant.

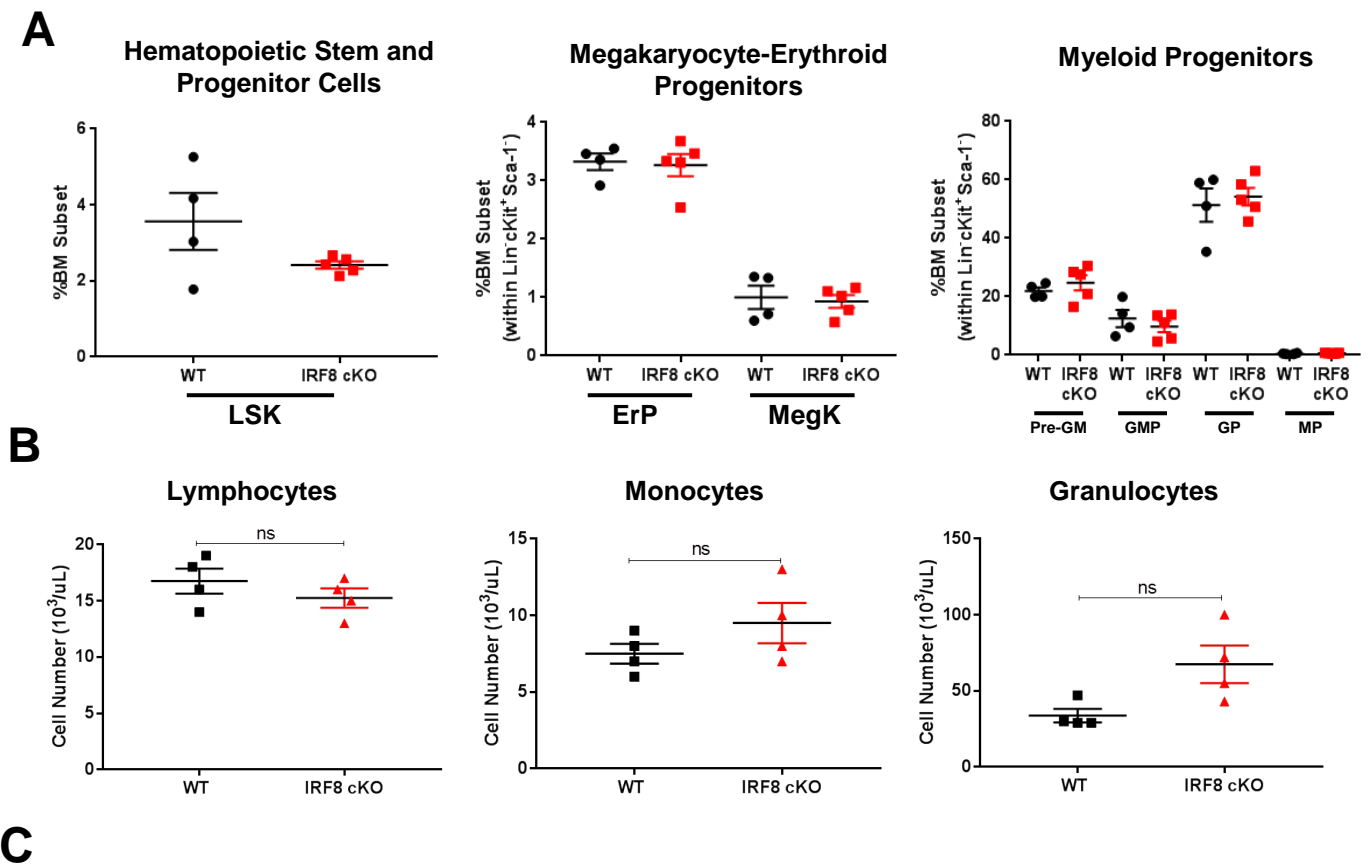

**Supplemental Figure 5. Characterization of bone marrow progenitor or peripheral immune cell populations in WT or IRF8 cKO tumor-bearing recipients.** Evaluation of major progenitor or peripheral immune populations from 4T1 tumor-bearing recipients that had received bone marrow from WT or IRF8 cKO mice. (A) Percentages of the indicated bone marrow progenitors, as performed in Figure 1, in tumor-bearing WT or IRF8 cKO recipients at endpoint, as in Figure 2. (B) Absolute numbers of lymphocytes (left), monocytes (middle) or granulocytes (right) were quantified by an automated CBC instrument. (C) Percentages of major immune cell populations in the spleen, primary tumor or lung of WT or IRF8 cKO recipients, as determined by flow cytometry. Cells were gated on the CD45.2<sup>+</sup> population, as in Supplemental Figure 4. Data recorded as mean ± SEM and significance determined by a 2-tailed Mann-Whitney test. Each data point represents a single mouse in A & B. In C, WT (n=4) or IRF8 cKO (n=5). \**P*<0.05; ns, not significant

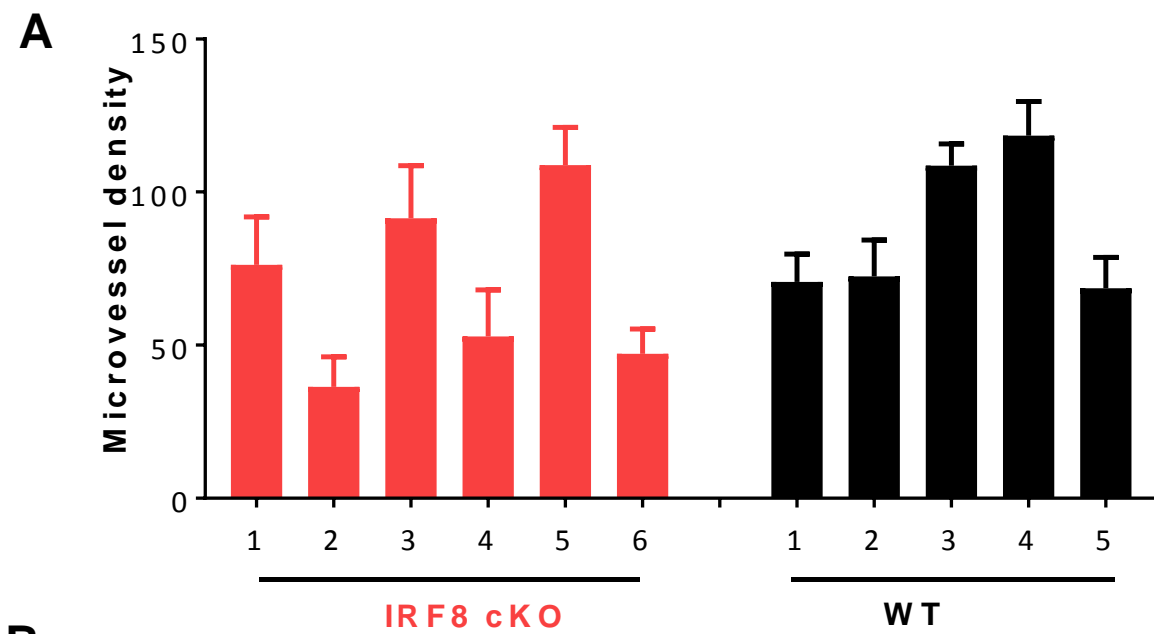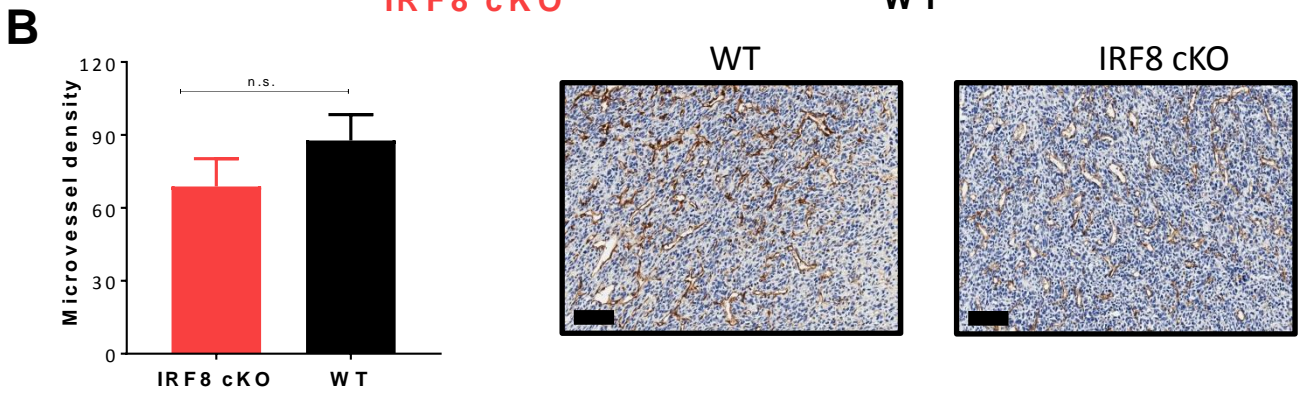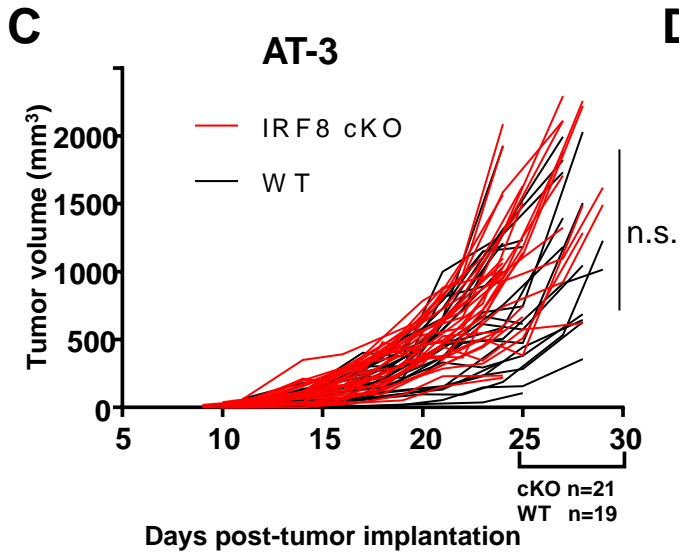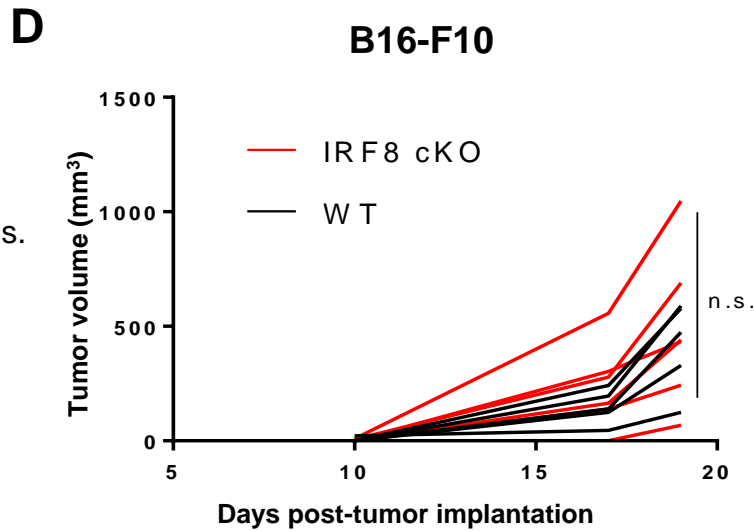

**Supplemental Figure 6. Reduced IRF8 expression in macrophages does not**

**affect microvessel density or increase tumor growth in primary tumors.** WT or

IRF8 cKO BM recipients were implanted with 4T1 cells, as in Figure 1. The entire tumor tissue was removed ~30 days later, and stained with anti-CD31 antibody to

identify endothelial cells for quantification of microvessel density. (A) Individual

microvessel density counts of each mouse. X-axis represents mouse ID numbers.

(B) Average microvessel density in the WT or IRF8 cKO groups. Representative

IHC images of anti-CD31 staining. Data were not significantly (n.s.) different by

the 2-tailed Mann-Whitney test (mean  $\pm$  SEM of 5 mice per group) (C) Tumor

growth of WT (n=25) or IRF8 cKO (n=31) mice implanted orthotopically with AT-3

mammary tumor cells ( $1 \times 10^5$ ). Tumor growth was not significantly different (mean

$\pm$  SEM of 25 to 31 mice per group). Data are compiled from 4 separate

experiments. (D) Tumor growth of B6 WT (n=5) or IRF8 cKO (n=6) mice

implanted with B16-F10 tumor cells SQ in the left flank ( $1 \times 10^5$ ). Tumor growth

was not statistically significant different.



**A****IRF8  
cKO**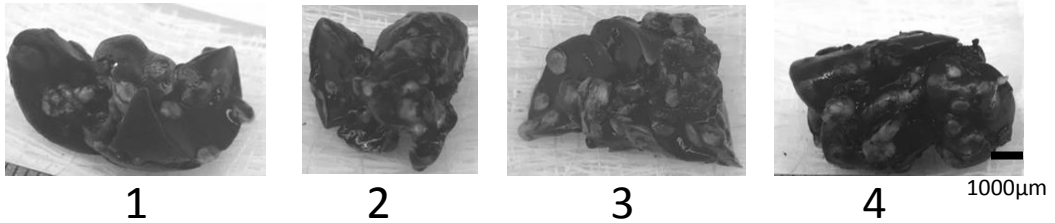**WT**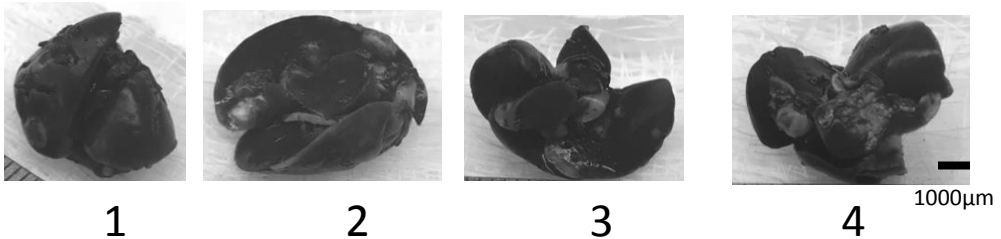

**Supplemental Figure 7. Reduced IRF8 expression in macrophages increases**

**experimental lung metastasis.** 4T1 cells ( $5 \times 10^4$ ) were injected intravenously into chimera mice reconstituted with WT (IRF8<sup>fl/fl</sup>) or IRF8 cKO bone marrow cells, as in Figures 2 and 4. Lung tumor burden was determined ~30 days later. Lung weights post-India ink staining in non-tumor bearing WT (IRF8<sup>fl/fl</sup>) or non-tumor-bearing IRF8 cKO mice (n=4 each) or the corresponding tumor-bearing groups are shown in Figure 4. Here, photographs of whole mouse lung after India ink staining revealed white metastatic nodules against a black tissue background.

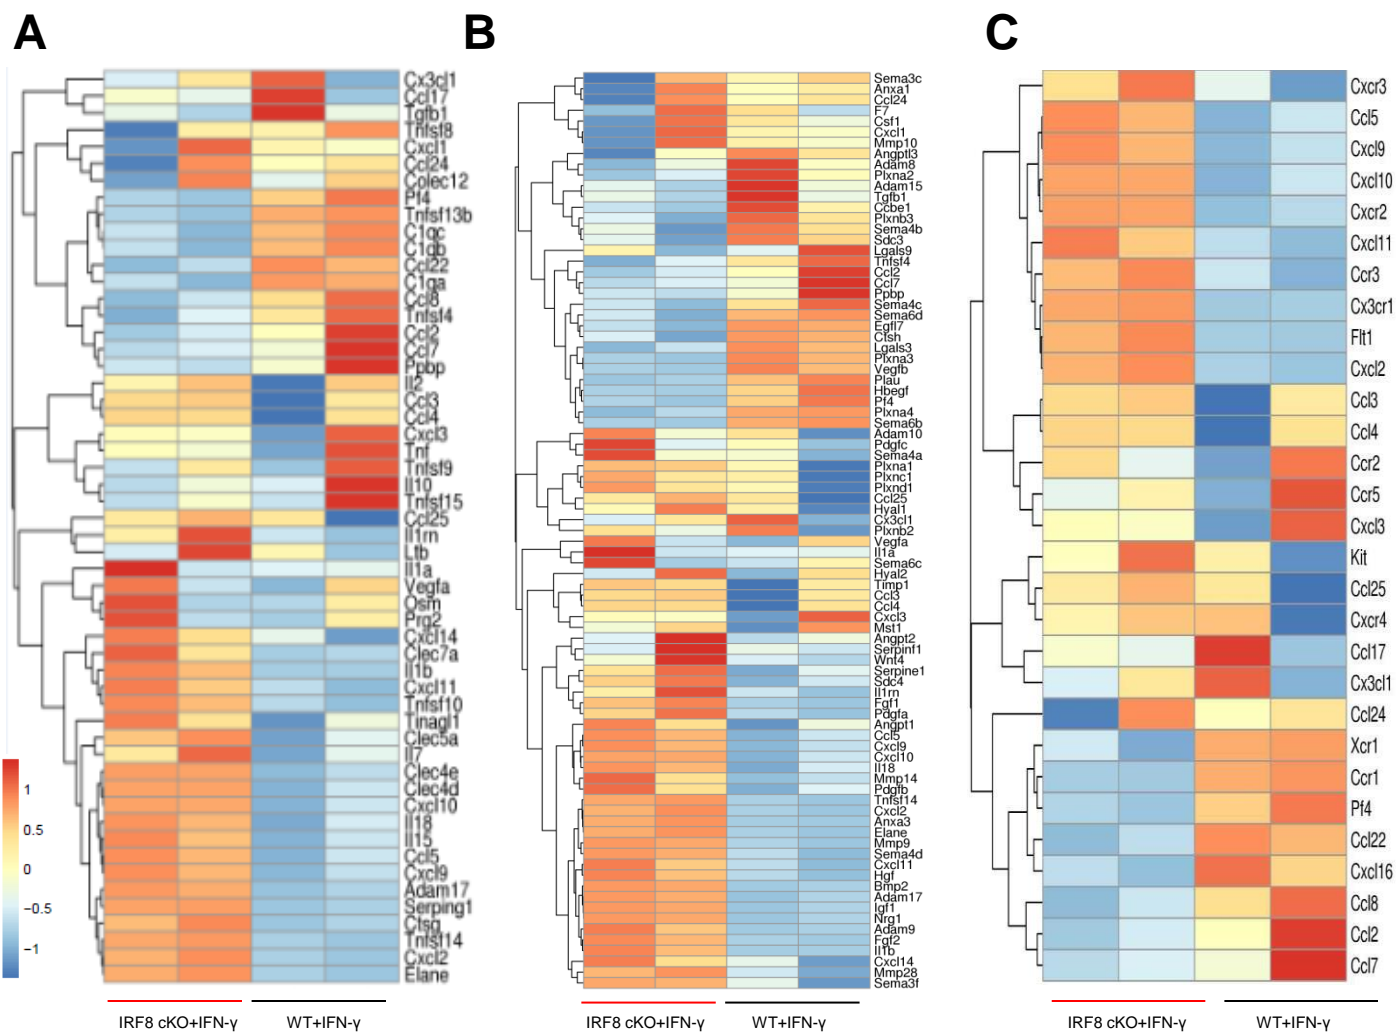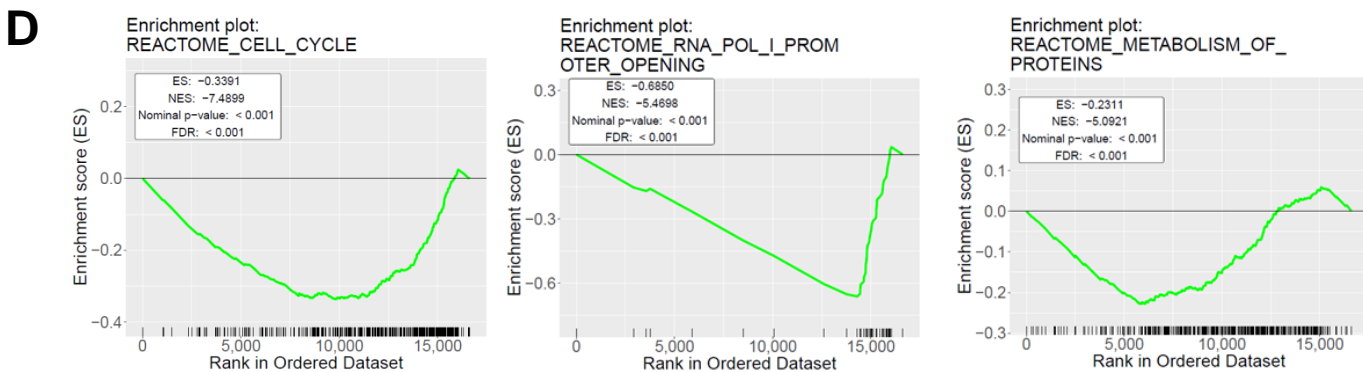

**Supplemental Figure 8. Reduced IRF8 expression in macrophages alters transcriptome of genes tied to immunity, cell migration and neutrophil chemotaxis.** (A-C) Transcriptome analysis of BMDMs from WT or IRF8 cKO mice (n=2 biologic replicates each) after treatment with IFN- $\gamma$  (100 U/mL) for 24 hours. Heat-map depicting gene sets involved in (A) immune response, (B) cell migration, and (C) neutrophil chemotaxis. (See Figure 5) (D) GSEA for examples of pathways downregulated in IRF8 cKO model.

**A**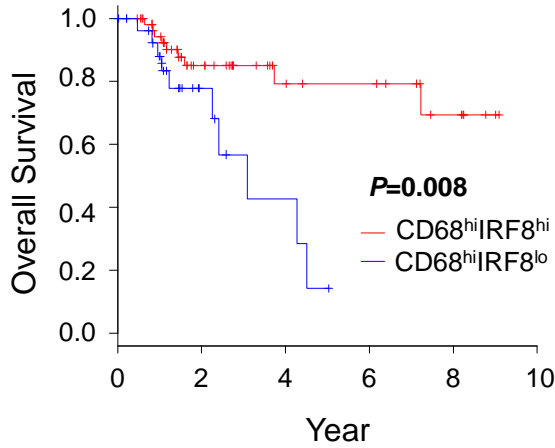

| Number at risk |    | 0  | 2  | 4  | 6 | 8 | 10 |
|----------------|----|----|----|----|---|---|----|
| High           | 58 | 28 | 14 | 12 | 6 | 0 |    |
| Low            | 31 | 8  | 3  | 0  | 0 | 0 |    |

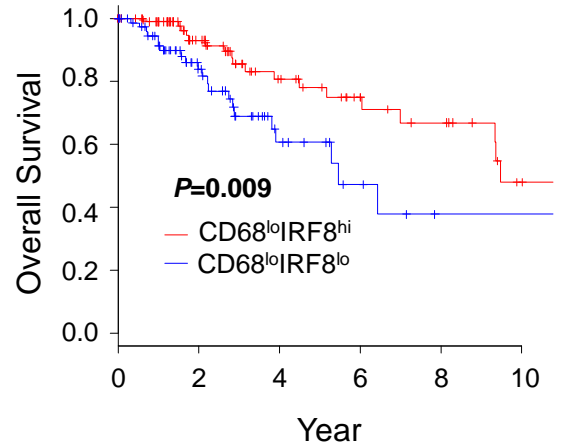

| Number at risk |    | 0  | 2  | 4  | 6  | 8 | 10 |
|----------------|----|----|----|----|----|---|----|
| High           | 97 | 57 | 32 | 19 | 15 | 6 |    |
| Low            | 82 | 38 | 14 | 6  | 2  | 2 |    |

**B**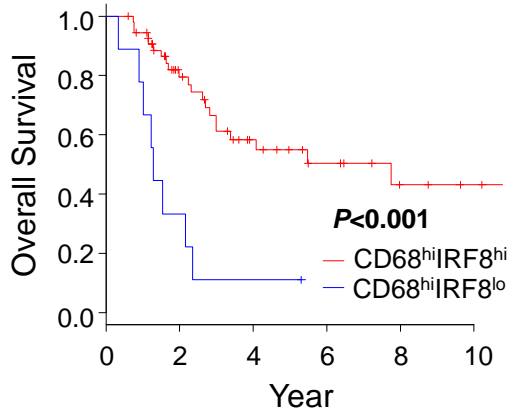

| Number at risk |    | 0  | 2  | 4  | 6 | 8 | 10 |
|----------------|----|----|----|----|---|---|----|
| High           | 55 | 32 | 17 | 10 | 5 | 3 |    |
| Low            | 9  | 3  | 1  | 0  | 0 | 0 |    |

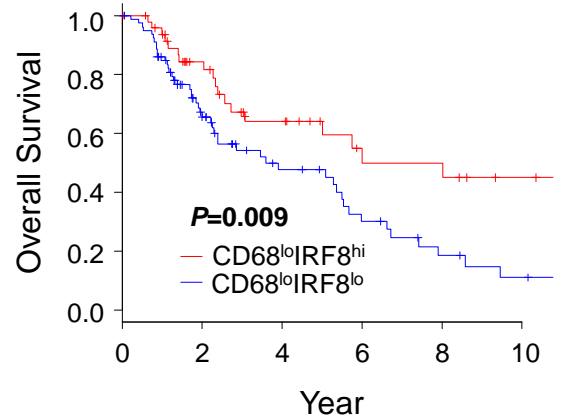

| Number at risk |    | 0  | 2  | 4  | 6  | 8 | 10 |
|----------------|----|----|----|----|----|---|----|
| High           | 49 | 31 | 19 | 11 | 10 | 6 |    |
| Low            | 80 | 40 | 21 | 12 | 6  | 3 |    |

**Supplemental Figure 9. A macrophage signature with higher IRF8 expression compared to lower IRF8 expression is associated with increased survival in late-stage breast cancer and melanoma patients.**

(A) Kaplan-Meier survival curves based on TCGA data from Figure 6 showing a profile of higher IRF8 expression compared to lower IRF8 expression in stage III/IV breast cancer patient tumors within a CD68<sup>+</sup> macrophage cohort [high (n=89 patients; *left panel*) or low (n=179 patients; *right panel*) macrophage infiltration] correlates with improved overall survival. IRF8 stratification is shown under ‘number at risk’. (B) Kaplan-Meier survival curves in stage III/IV melanoma patients based on TCGA data from Figure 6 and illustrated as in A [high (n=64 patients; *left panel*) or low (n=129 patients; *right panel*) macrophage infiltration]. Statistical analysis of the survival curves was determined by the log-rank test.

| <b>Antigen/marker</b>   | <b>Clone</b> | <b>Catalog number</b> | <b>Company</b>          |
|-------------------------|--------------|-----------------------|-------------------------|
| CD16/32                 | 2.4G2        | 560540                | BD Biosciences          |
| Ly6A/E (Sca-1)          | E13-161.7    | 122513                | BioLegend               |
| Ly6G/Ly6C(Gr-1)         | RB6-8C5      | 108409                | BioLegend               |
| CD135 (Flt3)            | A2F10        | 135305                | BioLegend               |
| CD117 (c-Kit)           | 30-F11       | 47-0451-82            | eBioscience             |
| Ly6C                    | RB6-8C5      | 108421                | BioLegend               |
| CD11b                   | M1/70        | 563553                | BD Biosciences          |
| CD11c                   | N418         | 117335                | BioLegend               |
| CD8a                    | 53-6.7       | 100708                | BioLegend               |
| CD150                   | TC15-12F12.2 | 115927                | BioLegend               |
| CD105                   | MJ7/18       | 48-1051-82            | eBioscience             |
| DAPI                    | N/A          | D1306                 | ThermoFisher Scientific |
| H-2K <sup>b</sup>       | AF6-88.5     | 562002                | BD Biosciences          |
| H-2D <sup>d</sup>       | 34-2-12      | 553579                | BD Biosciences          |
| B220                    | RA3-6B2      | 103247                | BioLegend               |
| F4/80                   | BM8          | 123110                | BioLegend               |
| CD45.2                  | 104          | 552950                | BD Biosciences          |
| IRF8                    | REA516       | 130-108-196           | Miltenyi Biotec         |
| CD31                    | MEC 13.3     | 550274                | BD Biosciences          |
| Goat anti-rat Ig        | N/A          | 554014                | BD Biosciences          |
| Fixable Viability Stain | N/A          | 565388                | BD Biosciences          |

**Supplemental Table 1: Antibodies used for flow cytometric analyses.**

| <b>Mouse Primer Name</b>  | <b>Sequence</b>                 |
|---------------------------|---------------------------------|
| Lyz2-Cre mutant           | CCC AGA AAT GCC AGA TTA CG      |
| Lyz2-Cre common           | CTT GGG CTG CCA GAA TTT CTC     |
| Lyz2-Cre wildtype         | TTA CAG TCG GCC AGG CTG AC      |
| IRF8 <sup>fl/fl</sup> Fwd | TTG GGG ATT TCC AGG CTG TTC TA  |
| IRF8 <sup>fl/fl</sup> Rev | CAC AGG GAG TCC CTC TTA CAA T   |
| GAPDH Fwd                 | CAT CAC CAT CTT CCA GGA GCG     |
| GAPDH Rev                 | GCT GAA TGG TGT GTG TCA TAG GC  |
| iNOS Fwd                  | ACA AGC TGC ATG TGA CAT CG      |
| iNOS Rev                  | GGC AAA GAT GAG CTC ATC CA      |
| Arg1 Fwd                  | GTG AAG AAC CCA CGG TCT GT      |
| Arg1 Rev                  | CTG GTT GTC AGG GGA GTG TT      |
| $\beta$ -actin Fwd        | CTG GCA CCA CAC CTT CTA CAA TG  |
| $\beta$ -actin Rev        | GGG TCA TCT TTT CAC GGT TGG     |
| Ccl5 Fwd                  | ATG GCT CGG ACA ACC ACT CCCT    |
| Ccl5 Rev                  | GGT TGG CAC ACA CTT GGCG        |
| Cxcl2 Fwd                 | GAA GTC ATA GCC ACT CTC AAGG    |
| Cxcl2 Rev                 | TTC CGT TGA GGG ACA GCA         |
| Elane Fwd                 | TGT GAA CGT ATG CAC TCT GG      |
| Elane Rev                 | CGA AGG CAT CTG GGT ACA AT      |
| MMP9 Fwd                  | ACG ACA TAG ACG GCA TCC AGT ATC |
| MMP9 Rev                  | AGG TAT AGT GGG ACA CAT AGT GGG |
| S100A8 Fwd                | TGC CAC ACC CAC TTT TAT CA      |
| S100A8 Rev                | GAG TGT CCT CAG TTT GTG CAG     |
| S100A9 Fwd                | AGA TGG CCA ACA AAG CAC CT      |
| S100A9 Rev                | TAA AGG TTG CCA ACT GTG CT      |

***Supplemental Table 2: Sequences for RT-PCR and quantitative RT-PCR primers***
